# Supplementary material
Source: Elsevier journal article supplement (https://git.physik.uzh.ch/gitbucket/mchrzasz/Lecture_repo/raw/473393374365f0d4e2b159c4f4e4c1c26922effe/Lectures_others/MC/W_Placzek_2010/mmc14.pdf)

# Mniej lub bardziej praktyczne zastosowania metod Monte Carlo

- Problem komiwojażera.
- Paradoks Parrondo.
- Losowy szereg harmoniczny.
- Czekanie na autobus.
- Osobliwa gra w trzy monety.
- Czekanie na czerwonym świetle.

⇒ P. J. Nahin, „Digital dice”, Princeton University Press, 2008.

- **Komiwojażer** (agent handlowy) startując z bazy w pewnym mieście, do której na końcu musi wrócić, ma odwiedzić  $(n - 1)$  innych miast poruszając się po możliwie **najkrótszej drodze**.
- Jeżeli  $n$  jest duże, to stajemy przed niezwykle pracochłonnym zadaniem policzenia długości każdej z możliwych  $(n - 1)!$  dróg, by wśród nich znaleźć tę najkrótszą.
- Istnieją systematyczne algorytmy obliczeniowe do określania optymalnego porządku wyboru kolejności odwiedzanych miast, a zatem wyznaczania długości  $l$  najkrótszej drogi – **niestety wymagają dużych mocy obliczeniowych!**
  - ▷ Czy można znaleźć prostszy sposób wyznaczenia  $l$ ?
- Jest oczywiste, że  $l$  powinno zależeć od pola powierzchni  $P$  obszaru zawierającego miasta oraz od gęstości  $\frac{n}{P}$  miast na tym obszarze.
  - ▷ Możemy zatem przyjąć, iż:

$$l \sim P^a \left(\frac{n}{P}\right)^b = P^{a-b} n^b.$$

- Z analizy wymiarowej wynika, że:

$$a - b = \frac{1}{2}$$

(wymiar długości jest pierwiastkiem kwadratowym wymiaru powierzchni).

► Stąd:

$$l \sim P^{\frac{1}{2}} n^{a - \frac{1}{2}}.$$

- Jeżeli pomnożymy pole powierzchni przez czynnik  $\alpha$  utrzymując przy tym stałą gęstość miast, to otrzymamy:

$$l \sim \alpha^{\frac{1}{2}} \alpha^{a - \frac{1}{2}} = \alpha^a.$$

- Z drugiej strony w takim przypadku odległość między miastami się nie zmieni (bo stała gęstość), natomiast liczba miast zmieni się  $\alpha$ -krotnie, zatem  $l$  zmieni się też  $\alpha$ -krotnie, czyli:

$$l \sim \alpha.$$

► Z powyższego mamy:

$$a = 1$$

- Zatem ostatecznie:

$$l = k (nP)^{\frac{1}{2}},$$

gdzie  $k$  – nieznaną stałą.

- W ogólności  $l$  musi oczywiście zależeć od kształtu obszaru zajmowanego przez miasta oraz od szczegółowych lokalizacji tych miast. Można jednak pokazać, że poza zaniedbywalną liczbą szczególnych przypadków ani kształt, ani szczegółowe ułożenie miast nie mają znaczenia, jeżeli  $n$  jest odpowiednio duże.

▷ Zatem powyższe wyrażenie jest prostą asymptotyczną formułą dla dużych  $n$ .

- **Aby móc użyć powyższej formuły do praktycznych obliczeń, potrzebujemy znać wartość stałej  $k$**
- **Żadna z dotychczas znanych teorii matematycznych nie pozwala wyznaczyć analitycznie wartości  $k$ .**
- Do obliczenia wartości  $k$  można wykorzystać eksperyment Monte Carlo:  
Bierzemy prosty obszar, np. kwadrat jednostkowy, i rozmieszczamy w nim jednorodnie i losowo  $n$  punktów, a następnie obliczamy  $l$ , skąd mamy:  $k = l (nP)^{-1/2}$ .

- Taki eksperyment Monte Carlo może wymagać sporej mocy obliczeniowej, ale kiedy raz wyznaczymy  $k$  dla szczególnego (prostego) przypadku, to wykalibrujemy naszą teorię i możemy powyższej formuły używać w dalszych praktycznych zastosowaniach.

► Okazuje się, że:

$$k \approx \frac{3}{4}.$$

- W ten sposób jednak wyznaczymy tylko długość  $l$  najkrótszej drogi, ale ciągle nie wiemy, której konkretnie drodze ta wartość odpowiada?
  - ▷ W niektórych problemach tego typu celem może być jedynie wyznaczenie wielkości będącej odpowiednikiem długości minimalnej drogi w problemie komiwojażera.

- Problem ten można przedstawić ważonego grafu  $\mathcal{G}$  z  $n$  węzłami oznaczonymi liczbami  $1, 2, \dots, n$ , które reprezentują miasta, oraz krawędziami między nimi reprezentującymi odległości między miastami  $\rightarrow$  wagi  $w_{ij}$ .

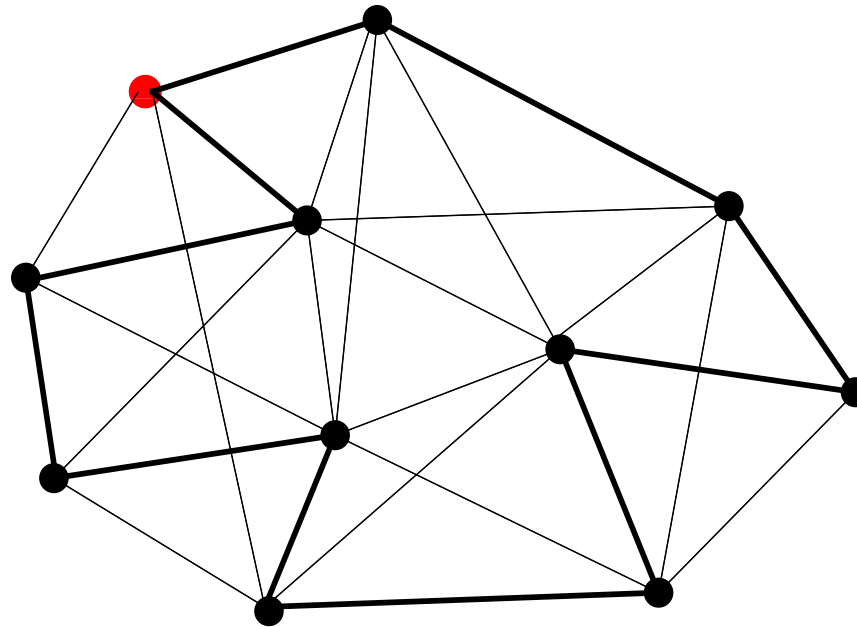

Przykładowy graf dla problemu komiwojażera: gruba linia pokazuje przykładową drogę komiwojażera z miasta-bazy oznaczonego czerwoną kropką przebiegającą przez wszystkie miasta danego obszaru oznaczone czarnymi kropkami i kończącą się w punkcie wyjścia.

- Istnieją algorytmy Monte Carlo pozwalające dość wydajnie rozwiązywać ten problem, np. **algorytm Metropolisa–Hastingsa** (w oparciu o metody fizyki statystycznej).

Juan Parrondo (fizyk hiszpański), 1997

► Czy przez połączenie dwóch gier przegrywających można uzyskać grę wygrywającą?

• Weźmy dwie gry **A** i **B** oparte o rzut monetą. Na początku gry posiadamy kapitał **M** dolarów.

1. Gra **A** polega na rzucie **nieuczciwą monetą**, w której prawdopodobieństwo wyrzucenia orła  $O$  wynosi:

$$\mathcal{P}(X = O : X \in \{O, R\}) = \frac{1}{2} - \epsilon, \quad 0 < \epsilon < \frac{1}{2}, \quad \text{np. } \epsilon = 0.005.$$

Kiedy wyrzucimy orła, to wygrywamy **1 dolara**, a kiedy reszkę  $R$ , to przegrywamy **1 dolara**.

► **Gra jest przegrywająca** – wraz z jej upływem nasz kapitał **M** będzie topniał!

2. W grze **B** mamy **dwie nieuczciwe monety**:

**moneta nr 1:**  $\mathcal{P}(X = O) = \frac{1}{10} - \epsilon, \quad 0 < \epsilon < \frac{1}{10},$

**moneta nr 2:**  $\mathcal{P}(X = O) = \frac{3}{4} - \epsilon, \quad 0 < \epsilon < \frac{3}{4}.$

Jeżeli nasz kapitał **M** jest wielokrotnością **3 dolarów**, to rzucamy **monetą nr 1**, a w przeciwnym wypadku **monetą nr 2**. Podobnie jak poprzednio, orzeł wygrywa **1 dolara**, a reszka przegrywa **1 dolara**.

► **Gra jest również przegrywająca!**

→ Można to nietrudno pokazać analitycznie.

- **Gra C** polega na losowym przełączaniu między grami **A** i **B** z prawdopodobieństwem  $\frac{1}{2}$ .
  - ▷ Z pozoru gra wygląda na przegrywającą.
  - ▶ **A jednak gra jest wygrywająca!** – nasz kapitał **M** rośnie wraz upływem czasu gry!

⇒ Ćwiczenie do samodzielnego wykonania (nieobowiązkowe):

Wykonać symulacje Monte Carlo gier **B** i **C**. Pokazać, że gra **B** jest przegrywająca, a gra **C** wygrywająca. *Wskazówka:* Wykonać wykres średniej z próby losowej dla  $M(k)$ , gdzie  $k = 1, 2, \dots$  jest liczbą rzutów monetą, w zależności od  $k$ , przez powtórzenie gier np.  $10^6$  razy.

▶ Przykładowe wyniki dla średniej z próby losowej  $10^4$  powtórzeń gier (na początku  $M = 0$ ):

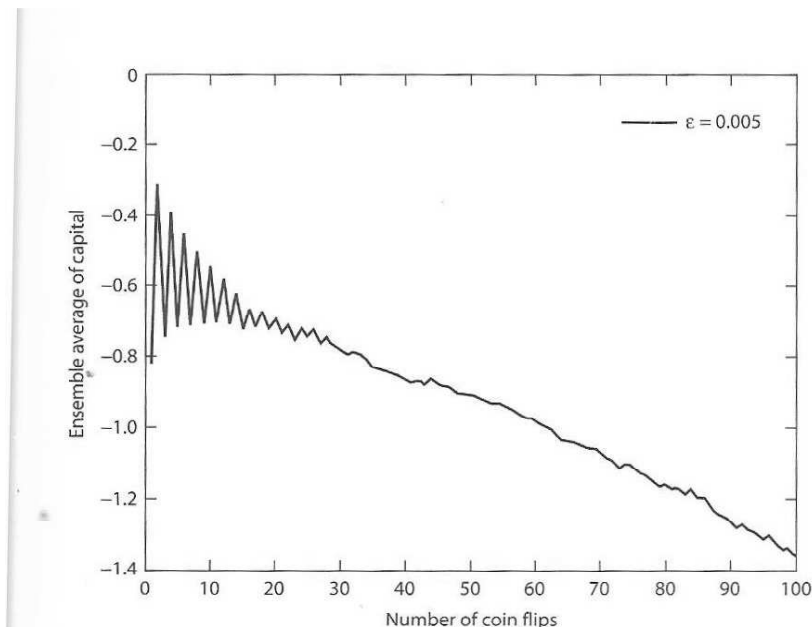

**Gra B**

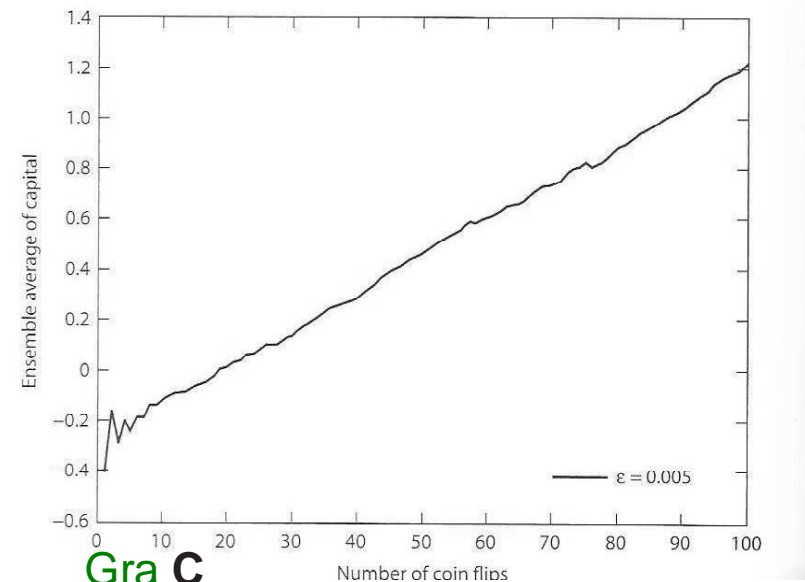

**Gra C**



- Niech

$$t_k \in \{-1, 1\} : \mathcal{P}(t_k = -1) = \mathcal{P}(t_k = 1) = \frac{1}{2}, \quad k = 1, 2, \dots$$

► **Twierdzenie Rademachera:**

Jeżeli  $\sum_{k=1}^{\infty} c_k^2 < \infty$ , to szereg  $\sum_{k=1}^{\infty} t_k c_k$  jest zbieżny z prawdopodobieństwem 1 (mogą istnieć szeregi rozbieżne tego typu, ale to zdarza się z prawdopodobieństwem zero, tzn. „prawie nigdy”).

- W szczególności tzw. losowy szereg harmoniczny (*random harmonic series – RHS*) postaci:

$$\sum_{k=1}^{\infty} \frac{t_k}{k}$$

„prawie na pewno” jest zbieżny, bo  $\sum_{k=1}^{\infty} \frac{1}{k^2} < \infty$ .

- Teoretyczne studia nad tym szeregiem zostały opublikowane w 1995 roku przez matematyka K. E. Morissona, gdzie wyniki analityczne były dodatkowo poparte symulacjami Monte Carlo. Wyniki obliczeń Monte Carlo zgodziły się rezultatami teoretycznymi, co stanowiło dodatkowy (mocny) argument dla poprawności tych ostatnich.

⇒ Ćwiczenie do samodzielnego wykonania (nieobowiązkowe):

Wykonać obliczenia Monte Carlo sum częściowych losowego szeregu harmonicznego  $\sum_{k=1}^n \frac{t_k}{k}$  dla  $n = 10^2, 10^3, 10^4$ , przy próbach losowych np.  $10^2, 10^4, 10^6$  powtórzeń. Wyniki zilustrować odpowiednimi histogramami.

► Przykładowe wyniki dla  $n = 100$  i próby losowej 50 000 powtórzeń:

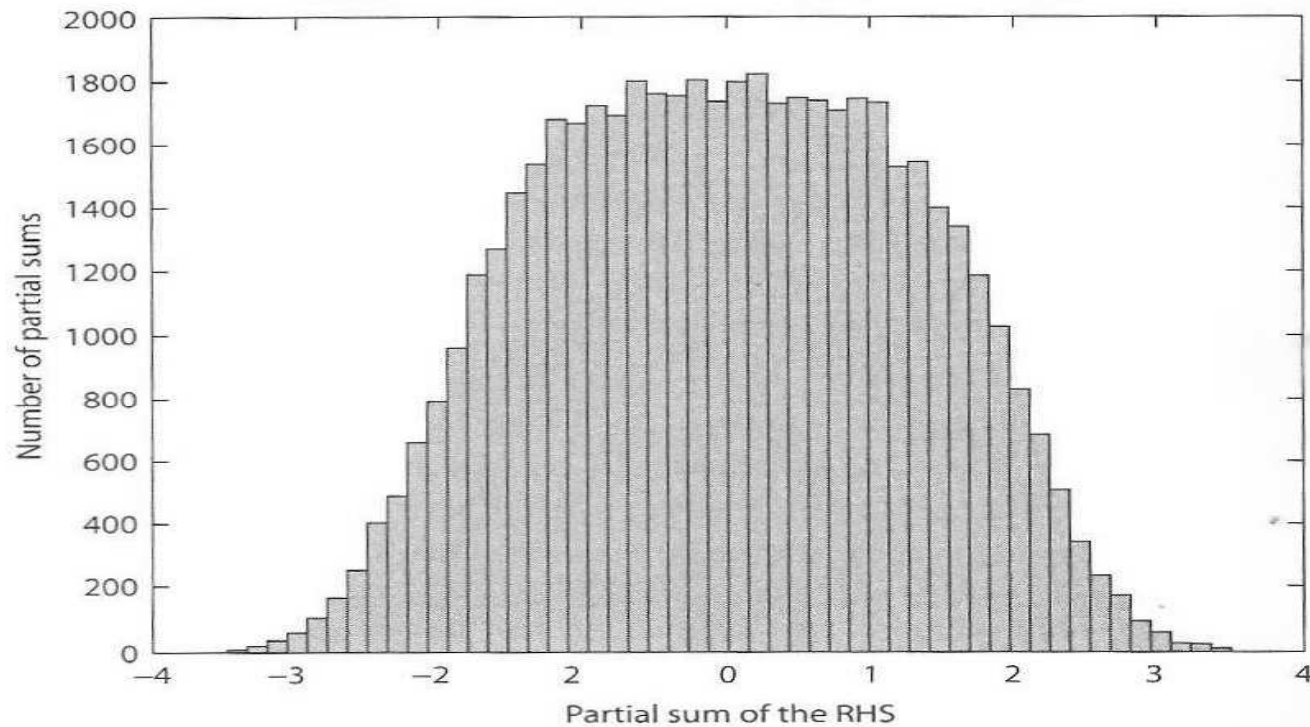

- Dany przystanek obsługuje  $n$  linii autobusowych (tramwajowych, metra, kolejowych itp.). Autobusy każdej linii jeżdżą co godzinę, przy czym autobusy 1-szej linii przyjeżdżają na przystanek dokładnie o równych godzinach, a pozostałe  $(n - 1)$  w pewnych odstępach czasu. Pasażer, który nie zna rozkładu jazdy autobusów traktuje te odstępy czasu jako losowe o rozkładzie równomiernym w zakresie od 0 od 1 godziny. Zatem sam przychodzi na przystanek w losowym czasie. Jaki jest średni czas czekania  $\langle t \rangle$  takiego pasażera na autobus?

⇒ Ćwiczenie do samodzielnego wykonania (nieobowiązkowe):

Wykonać symulacje Monte Carlo powyższego problemu dla  $n = 1, 2, 3, 4, 5$ .

▷ Zadanie to można rozwiązać analitycznie, co wymaga liczenia  $(n - 1)$ -wymiarowych całek.

▶ Szczególne rozwiązania:

▷  $n = 1$ :  $\langle t \rangle = 30$  min. (oczywiste!),

▷  $n = 2$ :  $\langle t \rangle = 20$  min. (mniej oczywiste!).

- Rozkłady równomierne odstępów czasów przyjazdu można zastąpić bardziej złożonymi rozkładami – różnymi dla różnych linii, ewentualnie uwzględniającymi opóźnienia związane ze stanem w korkach itp. (różne o różnych porach dnia). → Nie stanowi to problemu dla metod Monte Carlo, natomiast analitycznie może być trudne (a nawet niemożliwe) do rozwiązania!

Przykładowe wyniki symulacji Monte Carlo dla statystyki  $10^6$  prób  
(odstępny czasu losowane z rozkładu równomiernego)

| $n$ | $\langle t \rangle$ [h] | $\langle t \rangle$ [min.] |
|-----|-------------------------|----------------------------|
| 1   | 0.4996                  | $\approx 30$               |
| 2   | 0.3335                  | $\approx 20$               |
| 3   | 0.2503                  | $\approx 15$               |
| 4   | 0.2001                  | $\approx 12$               |
| 5   | 0.1667                  | $\approx 10$               |

## ► G. W. Petrie, 1941:

Trzech graczy posiada odpowiednio  $l$ ,  $m$  i  $n$  monet. Każdy z graczy bierze jedną monetę ze swojej puli, a następnie wszyscy równocześnie rzucają tymi monetami. Jeżeli dwie z nich pokazują tę samą stronę (dwa orły lub dwie reszki), a trzecia przeciwną (odpowiednio reszkę lub orła), to dwaj gracze, których monety pokazują to samo oddają je temu trzeciemu. Jeżeli natomiast wszystkie monety pokazują to samo (trzy orły lub trzy reszki), to wszyscy trzej powtarzają rzut tymi samymi monetami. Gra trwa dotąd, aż któryś z graczy straci wszystkie monety.

→ **Jaka jest średnia liczba rzutów monetami w tej grze?**

▷ Teoretyczne rozwiązanie tego zadania pojawiło się dopiero po 25 latach i to tylko dla przypadku uczciwych monet!

► Problem ten można łatwo rozwiązać metodą Monte Carlo dla dowolnego przypadku!

⇒ **Ćwiczenie do samodzielnego wykonania (nieobowiązkowe):**

Wykonać symulacje Monte Carlo powyższego problemu np. dla następujących trójek

$(l, m, n) = (1, 1, 1), (1, 2, 3), (2, 3, 4), (3, 3, 3), (4, 7, 9)$ . Jak zmienią się wyniki jeżeli monety będą nieuczciwe, np. przy prawdopodobieństwie wyrzucenia orła  $p = 0.4$ ? Sprawdzić wyniki dla innych wartości  $(l, m, n)$  oraz  $p$ .

Przykładowe wyniki symulacji Monte Carlo dla  $10^4$  powtórzeń gry

| $l$ | $m$ | $n$ | teoria: $p = 0.5$ | MC: $p = 0.5$ | MC: $p = 0.4$ |
|-----|-----|-----|-------------------|---------------|---------------|
| 1   | 1   | 1   | 1.333             | 1.335         | 1.3877        |
| 1   | 2   | 3   | 2                 | 2.0022        | 2.0814        |
| 2   | 3   | 4   | 4.5714            | 4.5779        | 4.7721        |
| 3   | 3   | 3   | 5.1428            | 5.161         | 5.36          |
| 4   | 7   | 9   | 18.6667           | 18.8065       | 19.4875       |

- ▷ Istnieje rozwiązanie teoretyczne tego problemu również dla przypadku nieuczciwych monet, ale jego złożoność obliczeniowa rośnie wykładniczo ze wzrostem  $l + m + n$ .

- Pieszy wędruje ulicami dużego miasta, w którym ulice przecinają się pod kątem prostym (typowe dla centrów miast USA), a na każdym skrzyżowaniu znajdują się światła sygnalizacyjne.
- Kiedy pieszy dochodzi do skrzyżowania, to zawsze w jednym kierunku napotyka na światła czerwone, a w kierunku prostopadłym na światła zielone i dalej podąża w tym właśnie kierunku. Przyjmujemy, że pieszy napotyka światła czerwone i zielone w dwu prostopadłych kierunkach zupełnie losowo i z jednakowym prawdopodobieństwem.
- Powiedzmy, że startuje on ze skrzyżowania o współrzędnych  $(m, n)$ , a chce dotrzeć do miejsca znajdującego się przy skrzyżowaniu  $(0, 0)$ . Na początku może się poruszać w „lewo” i w „dół” – wówczas nie musi czekać na światłach, bo zawsze będzie miał zielone w którymś kierunku. Ale gdy dojdzie do którejś krawędzi  $k = 0$  lub  $j = 0$ , to wtedy będzie się poruszał tylko w jednym kierunku (w „lewo” lub w „dół”) i czasem będzie musiał czekać na czerwonym świetle.

→ **Ile razy średnio pieszy będzie musiał czekać na czerwonym świetle zanim dotrze do celu?**

⇒ **Ćwiczenie do samodzielnego wykonania (nieobowiązkowe):**

Wykonać symulacje Monte Carlo powyższego problemu i obliczyć średnią liczbę napotykanym czerwonych światła dla każdego z 1001 przypadków z zakresu  $0 \leq m = n \leq 1000$  oraz sporządzić jej wykres.

## Schemat ulic dużego miasta

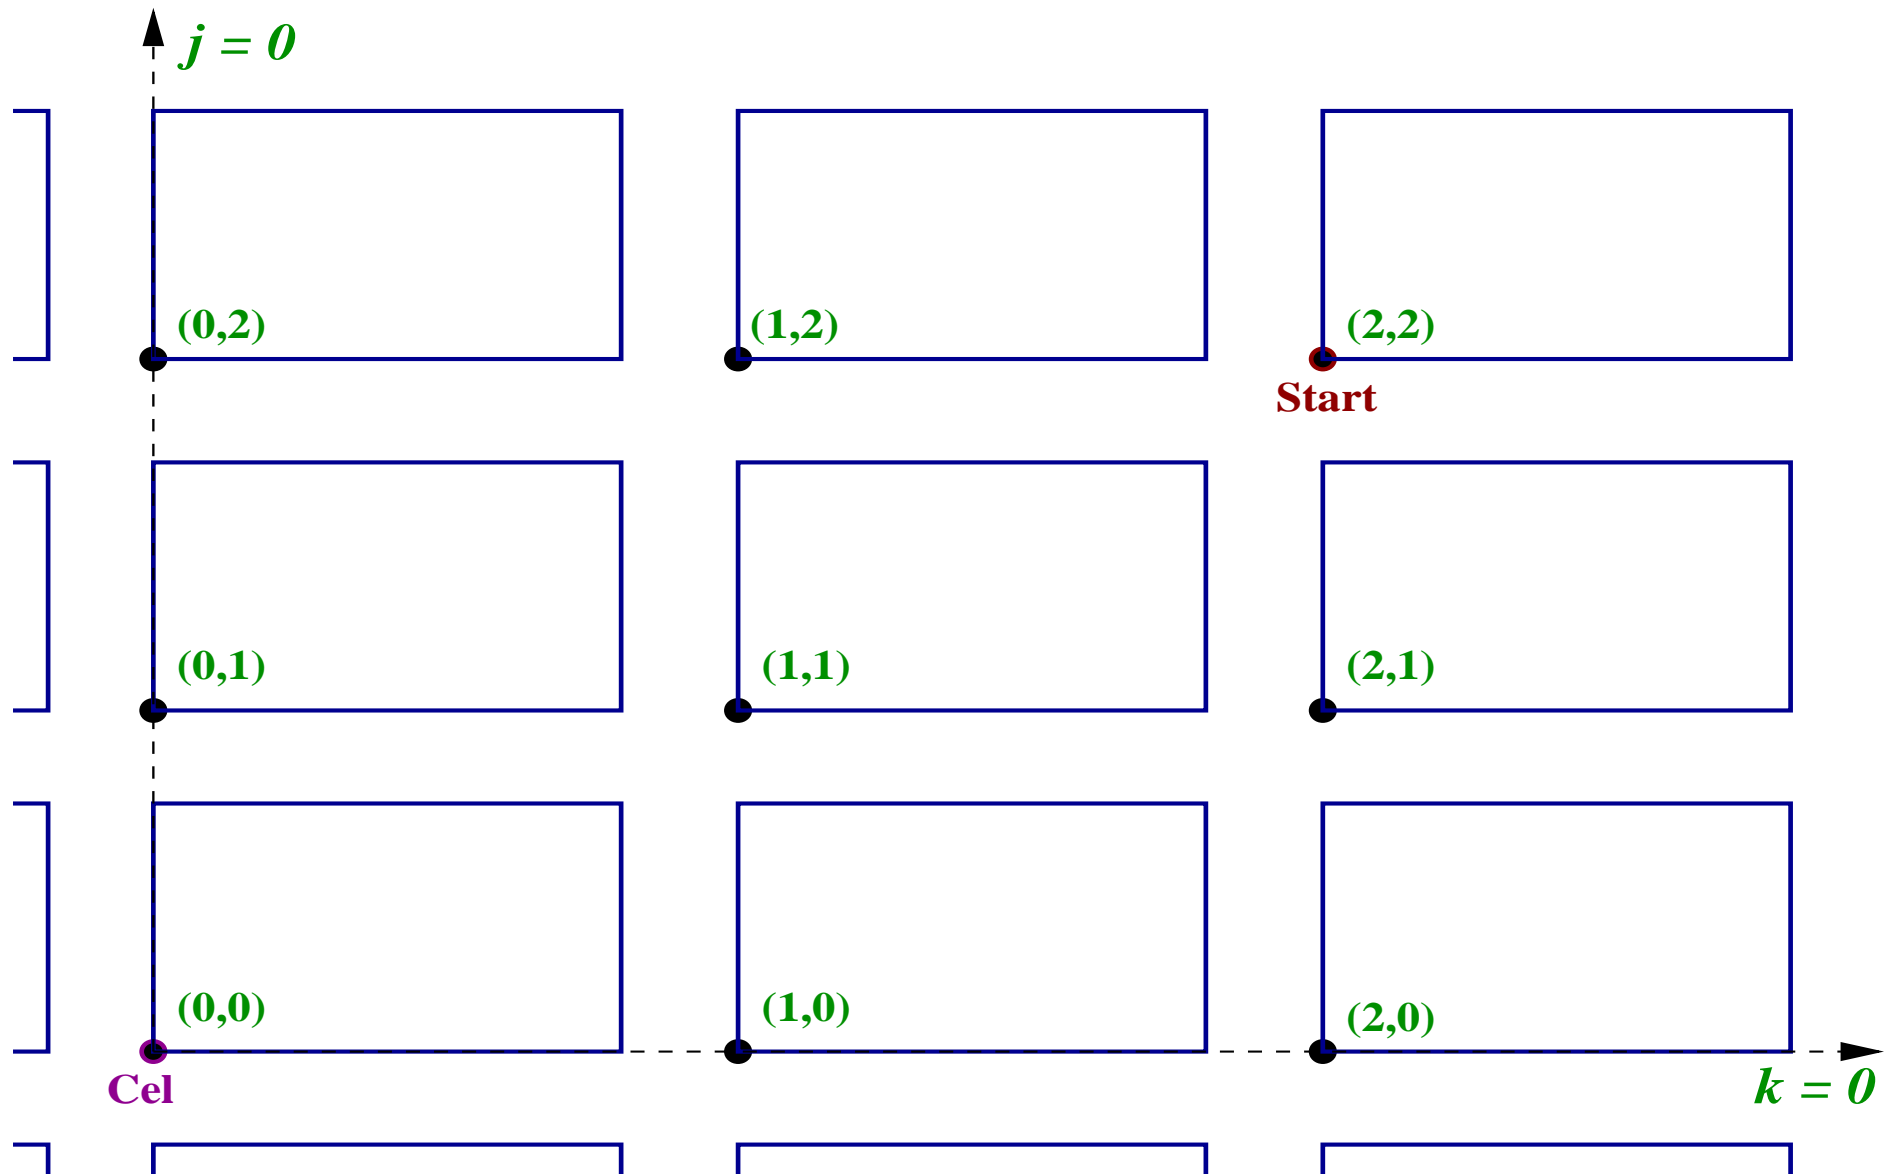



## ► Rozwiązanie rekurencyjne

Niech  $E(j, k)$  oznacza wartość oczekiwaną liczby czerwonych świateł napotykanym przez przechodnia w trakcie wędrówki z miejsca  $(j, k)$  do miejsca  $(0, 0)$ .

⇒ Otrzymujemy następującą formułę rekurencyjną:

$$E(j, k) = \frac{1}{2} E(j - 1, k) + \frac{1}{2} E(j, k - 1), \quad j, k > 0,$$

z warunkami brzegowymi:

$$E(0, k) = \frac{1}{2} k, \quad k \geq 0,$$

$$E(j, 0) = \frac{1}{2} j, \quad j \geq 0.$$

▷ Wartość tego wyrażenia można obliczać numerycznie albo metodą rekurencyjną, albo iteracyjną.

→ Czasochłonne dla dużych  $j$  i  $k$ !

⇒ Ćwiczenie do samodzielnego wykonania (nieobowiązkowe):

W oparciu o powyższą formułę rekurencyjną obliczać średnią liczbę napotykanym czerwonych świateł przez przechodnia – tak jak w poprzednim ćwiczeniu. Porównać otrzymane wyniki z wynikami symulacji Monte Carlo.

## Średnia liczby czerwonych świateł napotykanym przez przechodnia

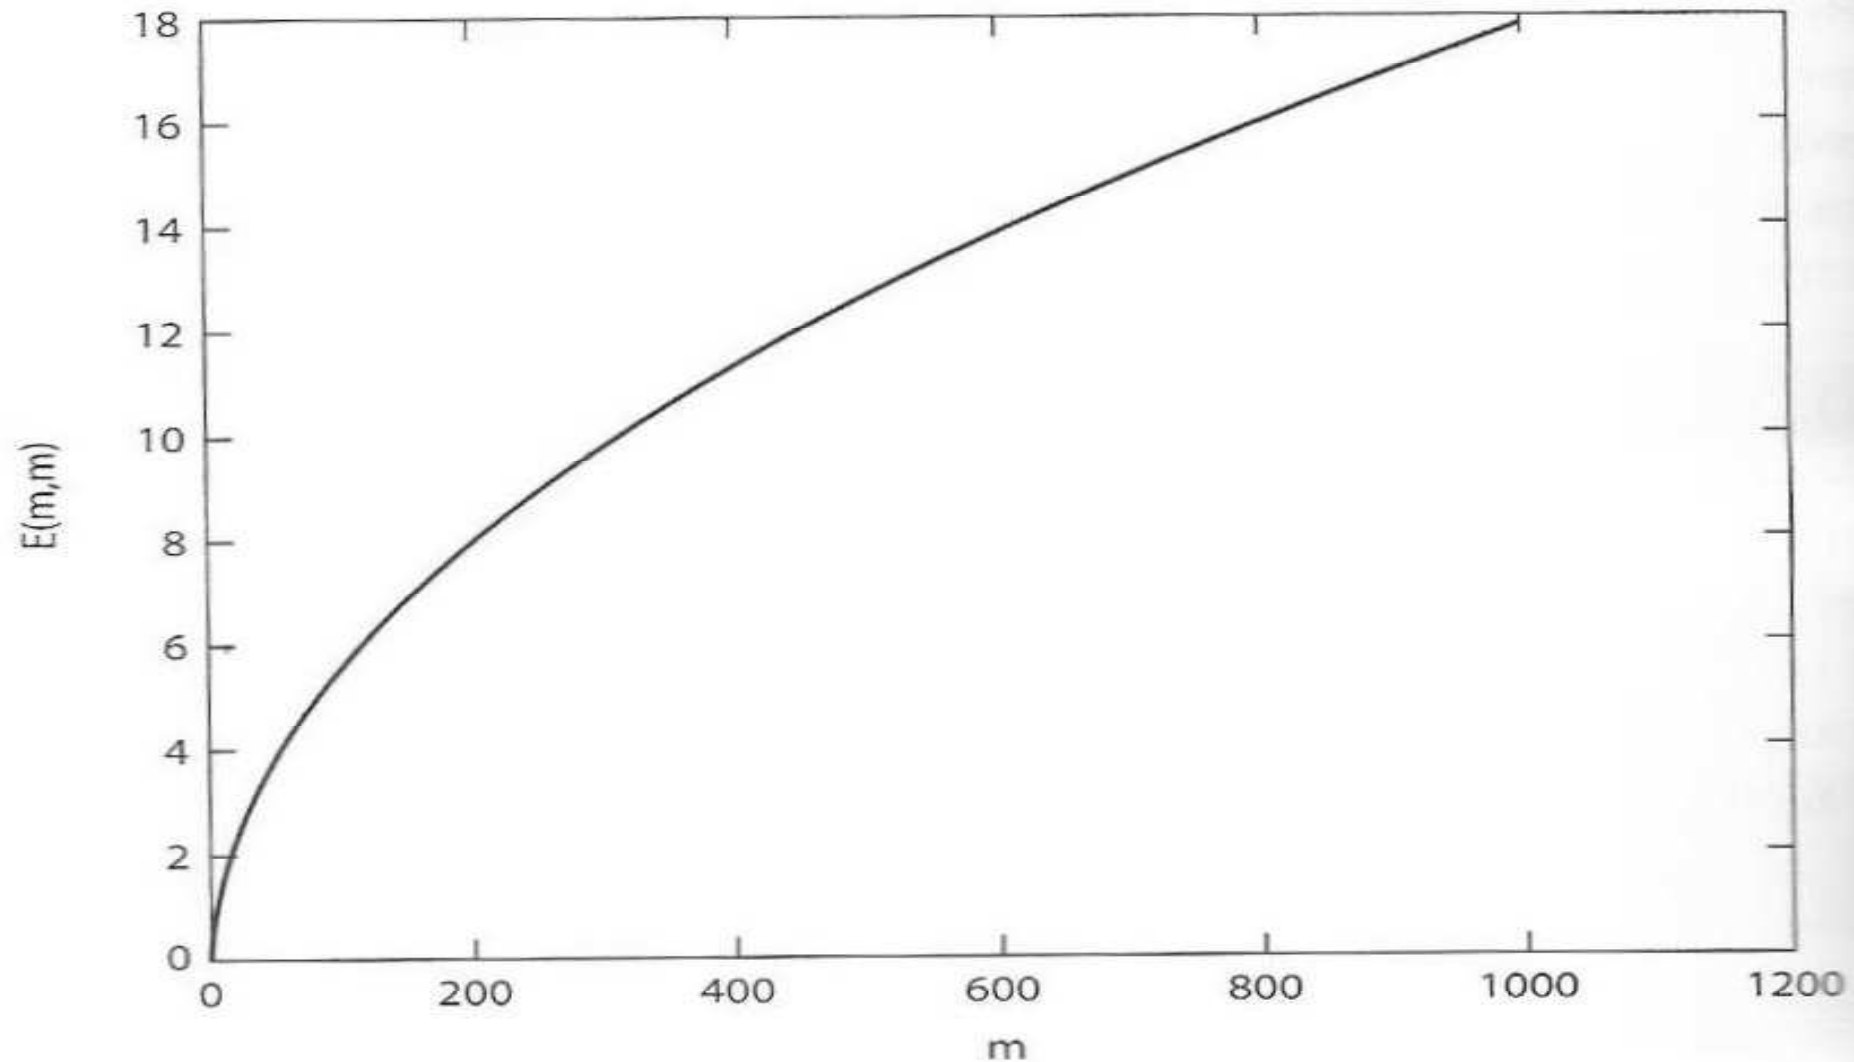

Supplement: mmc14 [file mmc14.pdf]
